# Supplementary material for: A bio-sensing surface with high biocompatibility for enhancing Raman scattering signals as enabled by a Mo–Ag film
Source: Royal Society of Chemistry journal article supplement (doi:10.1039/d2an00008c), 2022-01-01
Supplement: d2an00008c1.pdf [file d2an00008c1.pdf]

## Supporting Information

### **Bio-sensing surface with high biocompatibility for enhancing the Raman scattering signals as enabled by Mo-Ag film**

Dongzhen Chen<sup>a,\*</sup>, Yang Li<sup>a</sup>, Lijun Wang<sup>b</sup>, Yingjie Wang<sup>b</sup>, Pan Ning<sup>b</sup>, Powan Shum<sup>c</sup>,  
Xinhai He<sup>a</sup>, Tao Fu<sup>b,\*</sup>

*a Xi'an Key Laboratory of Textile Composites, Key Laboratory of Functional Textile Sensing  
Fiber and Irregular Shape Weaving Technology, School of Materials Science and Engineering,  
Xi'an Polytechnic University, Xi'an 710048, China*

*b Key Laboratory of Biomedical Information Engineering of Ministry of Education, School of Life  
Science and Technology, Xi'an Jiaotong University, Xi'an 710049, China*

*c Asahi Group Co. Ltd, Kwun Tong, Hong Kong, China*

**Table S1.** Full width at half maximum, peak position, and grain size of Mo-Ag films

| Sample name      | Full width at half maximum (deg.) | Peak position, 2theta (deg.) | Grain size (nm) |
|------------------|-----------------------------------|------------------------------|-----------------|
| Mo film          | 0.337                             | 40.58                        | 24.9            |
| Mo-Ag film (I)   | 0.453                             | 40.504                       | 18.5            |
| Mo-Ag film (II)  | 0.512                             | 40.206                       | 16.3            |
| Mo-Ag film (III) | 0.513                             | 40.171                       | 16.3            |
| Mo-Ag film (IV)  | 0.604                             | 40.071                       | 13.8            |
| Mo-Ag film (V)   | 0.845                             | 39.569                       | 9.9             |

**Table S2.** Atomic radius and crystal lattice constant of the elements.

|              | Ag   | Cr    | Mo    | W     | Ti   | Nb   |
|--------------|------|-------|-------|-------|------|------|
| Radius (Å)   | 1.34 | 1.18  | 1.30  | 1.30  | 1.32 | 1.34 |
| Constant (Å) | /    | 2.884 | 3.147 | 3.165 | /    | /    |

**Table S3.** Cumulative ion concentrations of Mo-Ag film (II) sample soaked for different time measured by ICP-MS.

| Time (h) | [Ag] (ng/mL) | [Mo] (ng/mL) |
|----------|--------------|--------------|
| 12       | 8.04         | 5.32         |
| 24       | 17.59        | 10.09        |
| 72       | 21.30        | 19.16        |

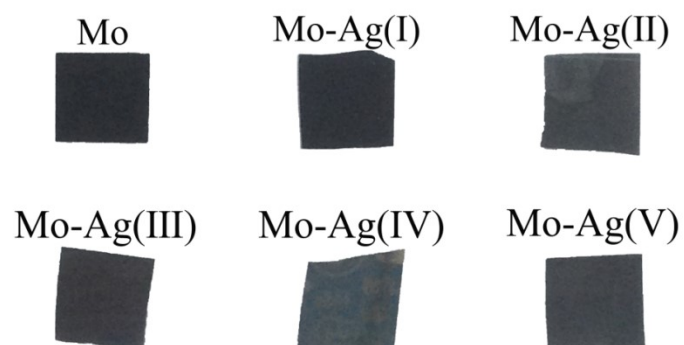

**Fig. S1.** The photographs of Mo film and Mo-Ag films, the films on a surface of glass sheet with size about  $1.2 \times 1.2 \text{ cm}^2$

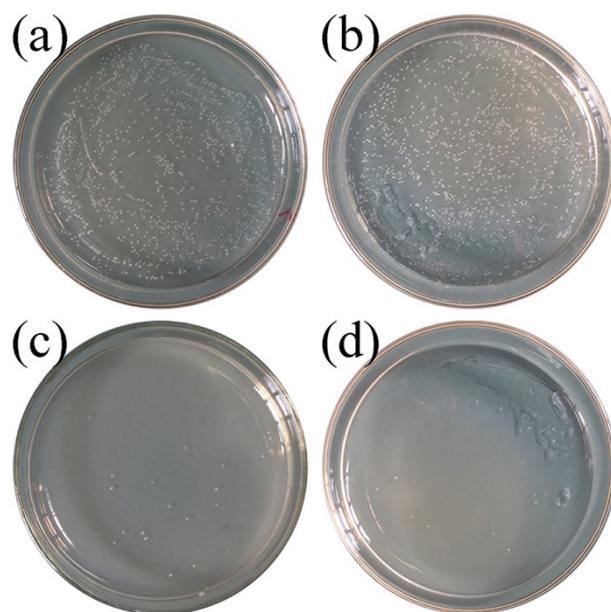

**Fig. S2** Representative antibacterial test result of slide glass and the Mo-Ag film samples against *E. coli*: (a-d) glass, Mo film, Mo-Ag (I) film and Mo-Ag (II) film

Antibacterial property of the samples was assessed by the agar plate counting method against *Escherichia coli* (*E. coli*) as the typical pathogenic and environmental bacteria. The samples were sterilized with UV light for 30 min per side. Then, 10  $\mu\text{L}$  of *E. coli* suspension (concentration of  $10^5$  colony forming units/mL) was dropped onto film surface of the samples, and the surface was covered soon by a piece of sterile filter membrane. After placed in wet atmosphere in dark at room temperature for 3 h, the samples were rinsed with 3 mL sterile water to collect the survival bacteria. After stirring by a vortex mixer for 1 min, 100  $\mu\text{L}$  of the suspension was dropped on the preformed Luria-Bertani agar plate, and spread evenly using a sterile spreader. The inoculums were cultured at  $37^\circ\text{C}$  for 24 h for observation. The samples were tested at least twice independently.

### **The preparation of Cr–Ag film<sup>1</sup>**

The Cr-Ag films were deposited on glass slides by a magnetron sputtering system. The substrates were degreased, ultrasonically cleaned and blown dry in flowing nitrogen gas in subsequence. In the sputtering system, two Cr elemental targets and one silver target (purity > 99.9%) were fixed for the deposition of Cr-Ag films. The substrates were mounted on the substrate holder that was rotated at a speed of 10 rpm. The vacuum chamber was evacuated and then pure Ar working gas (99.999% purity) was introduced. After plasma ion etching, the films were deposited with the Cr targets current of 4.0 A, the Ag target current of 0-2.0 A, the bias of –60 V and the deposition time of 15-30 min.

### Calculation of SERS Enhancement Factor (EF)

In order to further indicate the SERS intensity of the substrate, we calculate the enhanced factor of Mo-Ag film for MG test, the enhancement factor (EF) is calculated using the following formula:

$$EF = (I_{SERS} \times N_{SERS}) / (I_{RS} \times N_{RS})$$

In the formula,  $I_{SERS}$  represents the SERS signal intensity of the characteristic peak at  $1178 \text{ cm}^{-1}$  obtained from the detection of MG on the substrate, the concentration of the MG solution used is  $1 \times 10^{-7} \text{ mol/L}$ , and the characteristic peak intensity is about 693.6;  $I_{RS}$  represents the Raman intensities at  $1178 \text{ cm}^{-1}$  collected from MG with the concentration of  $0.01 \text{ mol/L}$ , and the characteristic peak intensity is about 265.9;  $N_{SERS}$  is the number of MG molecules that are dropped onto the Mo-Ag film and irradiated by the laser;  $N_{RS}$  is the number of MG molecules that are dropped onto the silicon wafer and irradiated by the laser.

The calculation process of  $N_{SERS}$  and  $N_{RS}$  is the same. The specific formula is as follows:

$$N = (V \times C \times NA) / S_2$$

$$N_{SERS} = N \times S_1$$

In this formula,  $N$  is the number of MG molecules per unit area;  $S_1$  represents the area of the laser spot, about  $0.785 \mu\text{m}^2$ ;  $V$  is the volume of the MG solution dropped;  $C$  represents the concentration of the MG solution;  $NA$  is avogadro's constant (about  $6.02 \times 10^{23}$ );  $S_2$  is corresponding area that adsorbed MG molecule at Mo-Ag film.

Drop  $10 \mu\text{L}$  of MG solution ( $0.01 \text{ mol/L}$ ) on the silicon wafer, forming a deposition area of about  $1.486 \times 10^7 \mu\text{m}^2$ , and the corresponding surface area of the Mo-Ag film is  $1.6 \times 10^9 \mu\text{m}^2$ . The Raman signal collection is carried out under the same experimental conditions, and the diameter of the laser spot is about  $1 \mu\text{m}$ . The calculation results of  $N_{SERS}$  and  $N_{RS}$  are  $2.95 \times 10^2$  and  $3.18 \times 10^9$ , respectively. Finally, the calculated EF of Mo-Ag film to MG molecule is about  $2.8 \times 10^7$ .

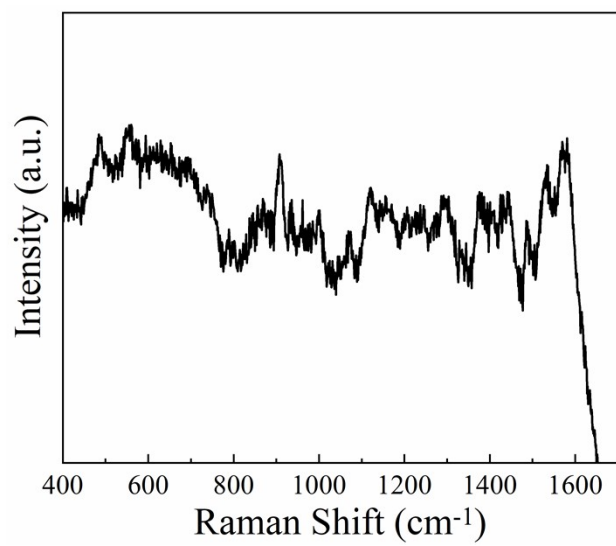

**Fig. S3** SERS spectrum of *S. aureus*

**Table S4.** The detailed Raman band assignment of MG.

| Raman band assignments                          | Observed /cm <sup>-1</sup> | Reported /cm <sup>-1 2</sup> |
|-------------------------------------------------|----------------------------|------------------------------|
| Out-of-plane vibrations of Phenyl-C-Phenyl      | 412                        | 417                          |
| Ring skeletal vibrations of radical orientation | 913                        | 917                          |
| Ring C-H in-plane vibrations                    | 1178                       | 1171                         |
| N-Phenyl stretching                             | 1388                       | 1398                         |
| Ring C-C stretching                             | 1589                       | 1595                         |
| Ring C-C stretching                             | 1615                       | 1617                         |

**Table S5.** The detailed Raman band assignment of thiram.

| Raman band assignments                      | Observed /cm <sup>-1</sup> | Reported /cm <sup>-1 2</sup> |
|---------------------------------------------|----------------------------|------------------------------|
| S-S stretching                              | 560                        | 556                          |
| CH <sub>3</sub> N stretching                | 933                        | 928                          |
| C-N stretching, CH <sub>3</sub> rocking     | 1149                       | 1150                         |
| C-N stretching, CH <sub>3</sub> deformation | 1383                       | 1387                         |
| C-N stretching, CH <sub>3</sub> deformation | 1513                       | 1508                         |

**Table S6.** The detailed Raman band assignment of *E.coli*.

| Raman band assignments                   | Observed /cm <sup>-1</sup> | Reported /cm <sup>-1 3-5</sup> |
|------------------------------------------|----------------------------|--------------------------------|
| S-S bond stretching                      | 524                        | 530                            |
| Adenine from flavin                      | 687                        | 690                            |
| Nucleic acids (cytidine, uracil)         | 800                        | 772-900                        |
|                                          | 889                        |                                |
| G (external $\nu$ (C-N))                 | 1176                       | 1180                           |
| Phe, Amidelll; $\delta$ (=CH) in lipids  | 1207                       | 1206                           |
| N-H and C-H bend                         | 1293                       | 1295-1336                      |
| $\nu$ (COO-) and $\delta$ (C-H) proteins | 1393                       | 1396                           |
| $\delta$ (CH <sub>2</sub> )              | 1432                       | 1434                           |
| Nucleic acids                            | 1618                       | 1627                           |



**Table S7.** The detailed Raman band assignment of *S.aureus*

| Raman band assignments                                              | Observed /cm <sup>-1</sup> | Reported /cm <sup>-1</sup> 6-8 |
|---------------------------------------------------------------------|----------------------------|--------------------------------|
| Tyrosine                                                            | 653                        | 640                            |
| C=C deformation                                                     | 936                        | 955                            |
| Phenylalanine (in protein); $\beta$ -carotene (pigmentation)        | 1000                       | 1004                           |
| C-C-stretch; phospholipid bilayer; $\beta$ -carotene (pigmentation) | 1162                       | 1158                           |
| $\delta$ (CH <sub>2</sub> ) amide III (bacteria)                    | 1242                       | 1240                           |
| Amide III (in Protein), DNA/RNA, lipids                             | 1294                       | 1290                           |
| $\nu$ (NH <sub>2</sub> ) adenine, polyadenine, DNA (bacteria)       | 1331                       | 1330                           |
| $\nu$ (COO <sup>-</sup> ) and $\delta$ (C-H) Proteins(bacteria)     | 1376                       | 1388                           |
| $\beta$ -carotene (pigmentation)                                    | 1533                       | 1520                           |

## References

1. L. J. Wang, Y. J. Wang, P. W. Shum, Y. F. Hou and T. Fu, *Coatings*, 2021, **11**, 1153.
2. J. Huang, D. Ma, F. Chen, D. Chen, M. Bai, K. Xu and Y. Zhao, *ACS Appl. Mater. Interfaces*, 2017, **9**, 7436-7446.
3. T. Fang, W. Shang, C. Liu, J. Xu, D. Zhao, Y. Liu and A. Ye, *Anal. Chem.*, 2019, **91**, 9932-9939.
4. D. Chen, P. Ning, Y. Zhang, J. Jing, M. Zhang, L. Zhang, J. Huang, X. He, T. Fu, Z. Song, G. He, D. Qian and X. Zhu, *ACS Appl. Mater. Interfaces*, 2020, **12**, 20138-20144.
5. M. Kögler, J. Itkonen, T. Viitala and M. G. Casteleijn, *Sci. Rep.*, 2020, **10**, 2472.
6. H. Wang, Y. F. Zhou, X. X. Jiang, B. Sun, Y. Zhu, H. Wang, Y. Y. Su, Y. He, *Angew. Chem., Int. Ed.* 2015, **54**, 5132-5136.
7. C. C. Lin, Y. M. Yang, P. H. Liao, D. W. Chen, H. P. Lin, H. C. Chang, *Biosens. Bioelectron.* 2014, **53**, 519-527.
8. D. Chen, L. Zhang, P. Ning, H. Yuan, Y. Zhang, M. Zhang, T. Fu and X. He, *Nano Res.*, 2021, **14**, 4885-4893.
